# Supplementary material for: Subseasonal hydrometeorological ensemble predictions in small- and medium-sized mountainous catchments: benefits of the NWP approach
Source: Copernicus journal article supplement (doi:10.5194/hess-23-493-2019), 2019-01-28
Supplement: Supplementary file 1 [file hess-23-493-2019-supplement.pdf]

Supplement of Hydrol. Earth Syst. Sci., 23, 493–513, 2019  
<https://doi.org/10.5194/hess-23-493-2019-supplement>  
© Author(s) 2019. This work is distributed under  
the Creative Commons Attribution 4.0 License.

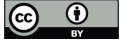

*Supplement of*

## **Subseasonal hydrometeorological ensemble predictions in small- and medium-sized mountainous catchments: benefits of the NWP approach**

**Samuel Monhart et al.**

*Correspondence to:* Samuel Monhart ([samuel.monhart@wsl.ch](mailto:samuel.monhart@wsl.ch))

The copyright of individual parts of the supplement might differ from the CC BY 4.0 License.

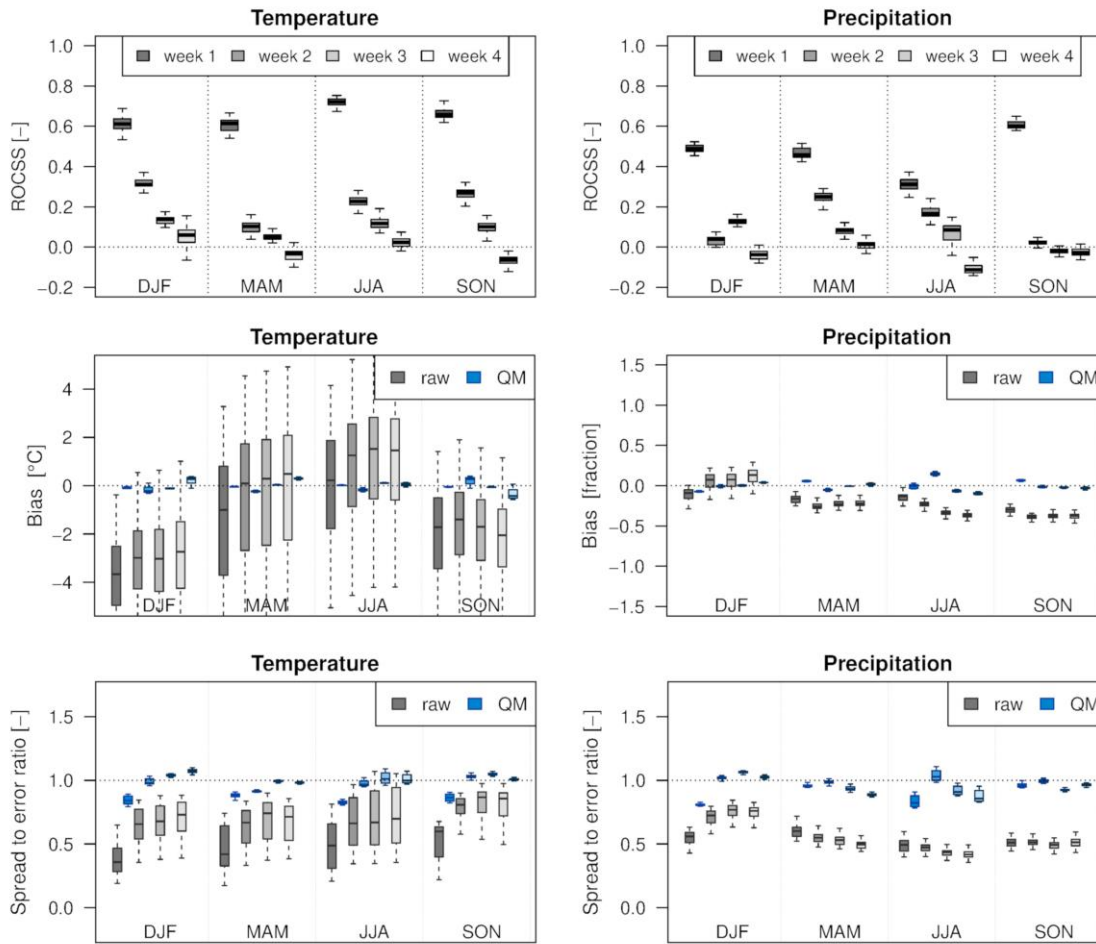

**Figure S 1: ROCSS, Bias and Spread to error ratio for temperature and precipitation reforecast in the Verzasca catchment.**

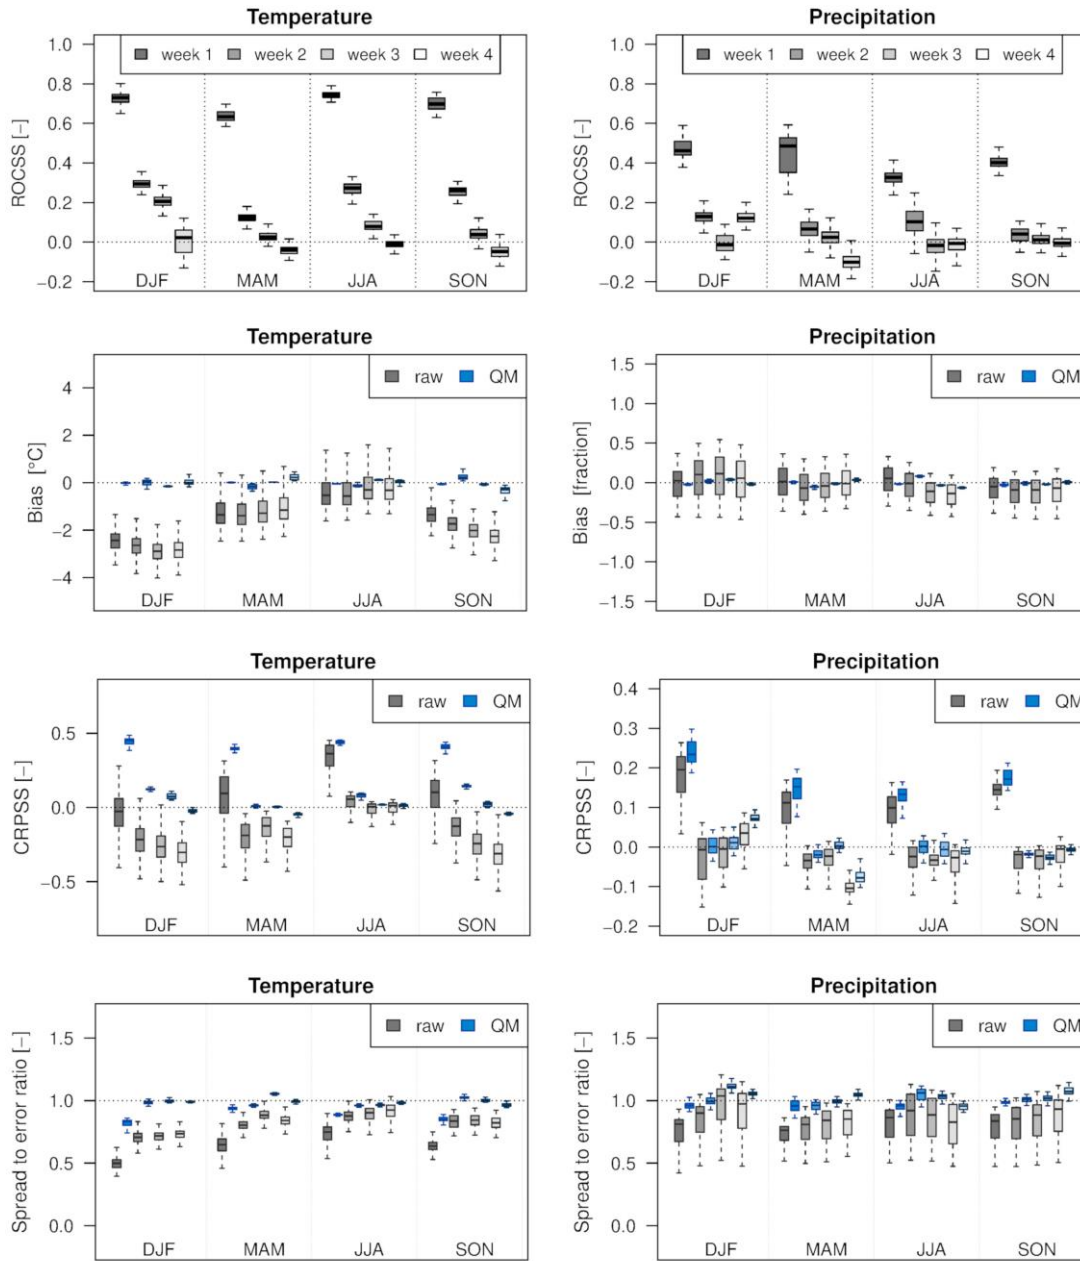

Figure S 2: Same as Figure S 1 but for the Thur catchment. In addition to Figure S1, the CRPSS is shown here as well.

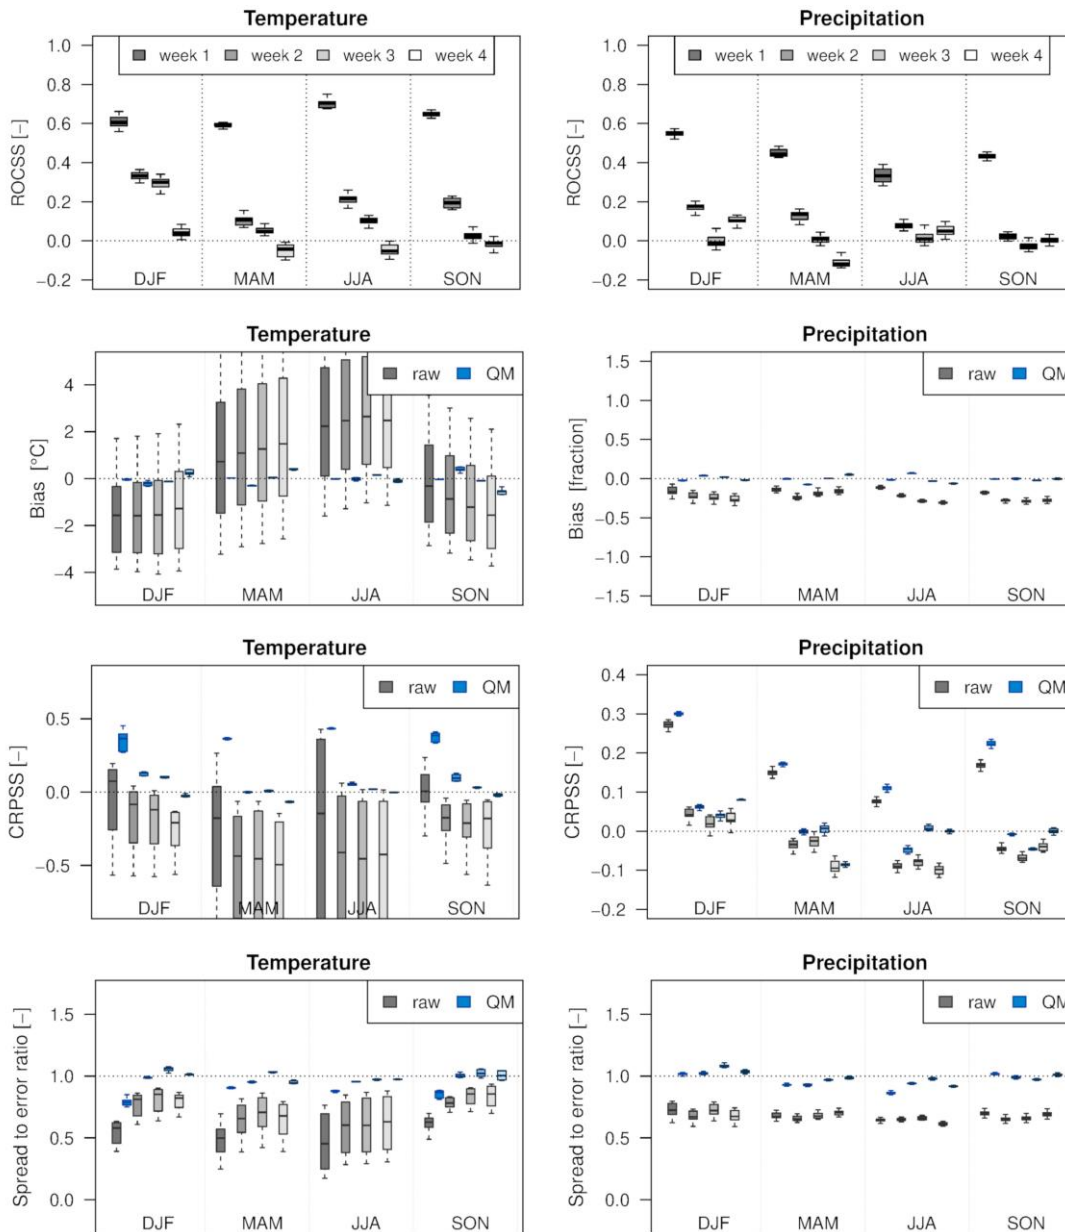

Figure S 3: Same as Figure S 2 but for the Klöntal catchment.

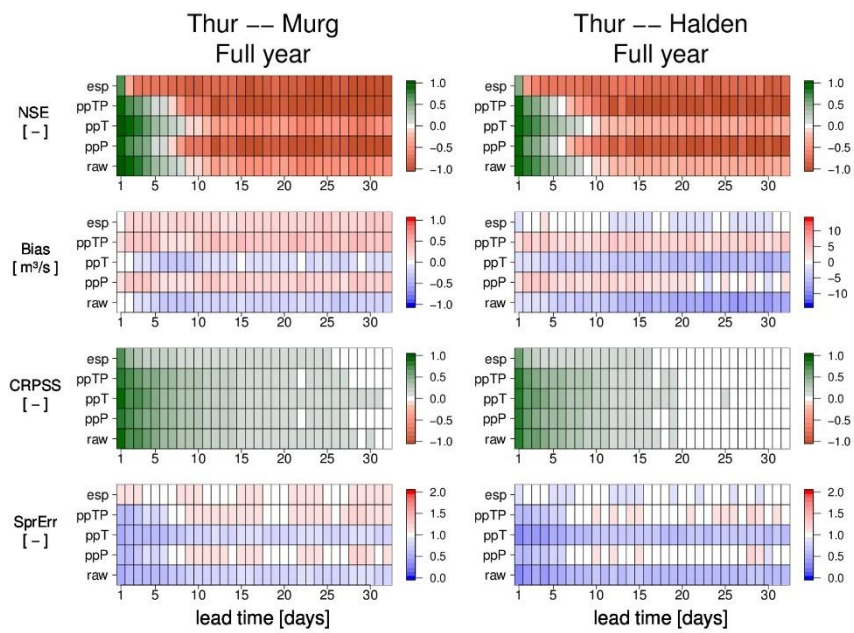

**Figure S 4:** As in Figure 4 but for the Thur subcatchments Murg and Halden.

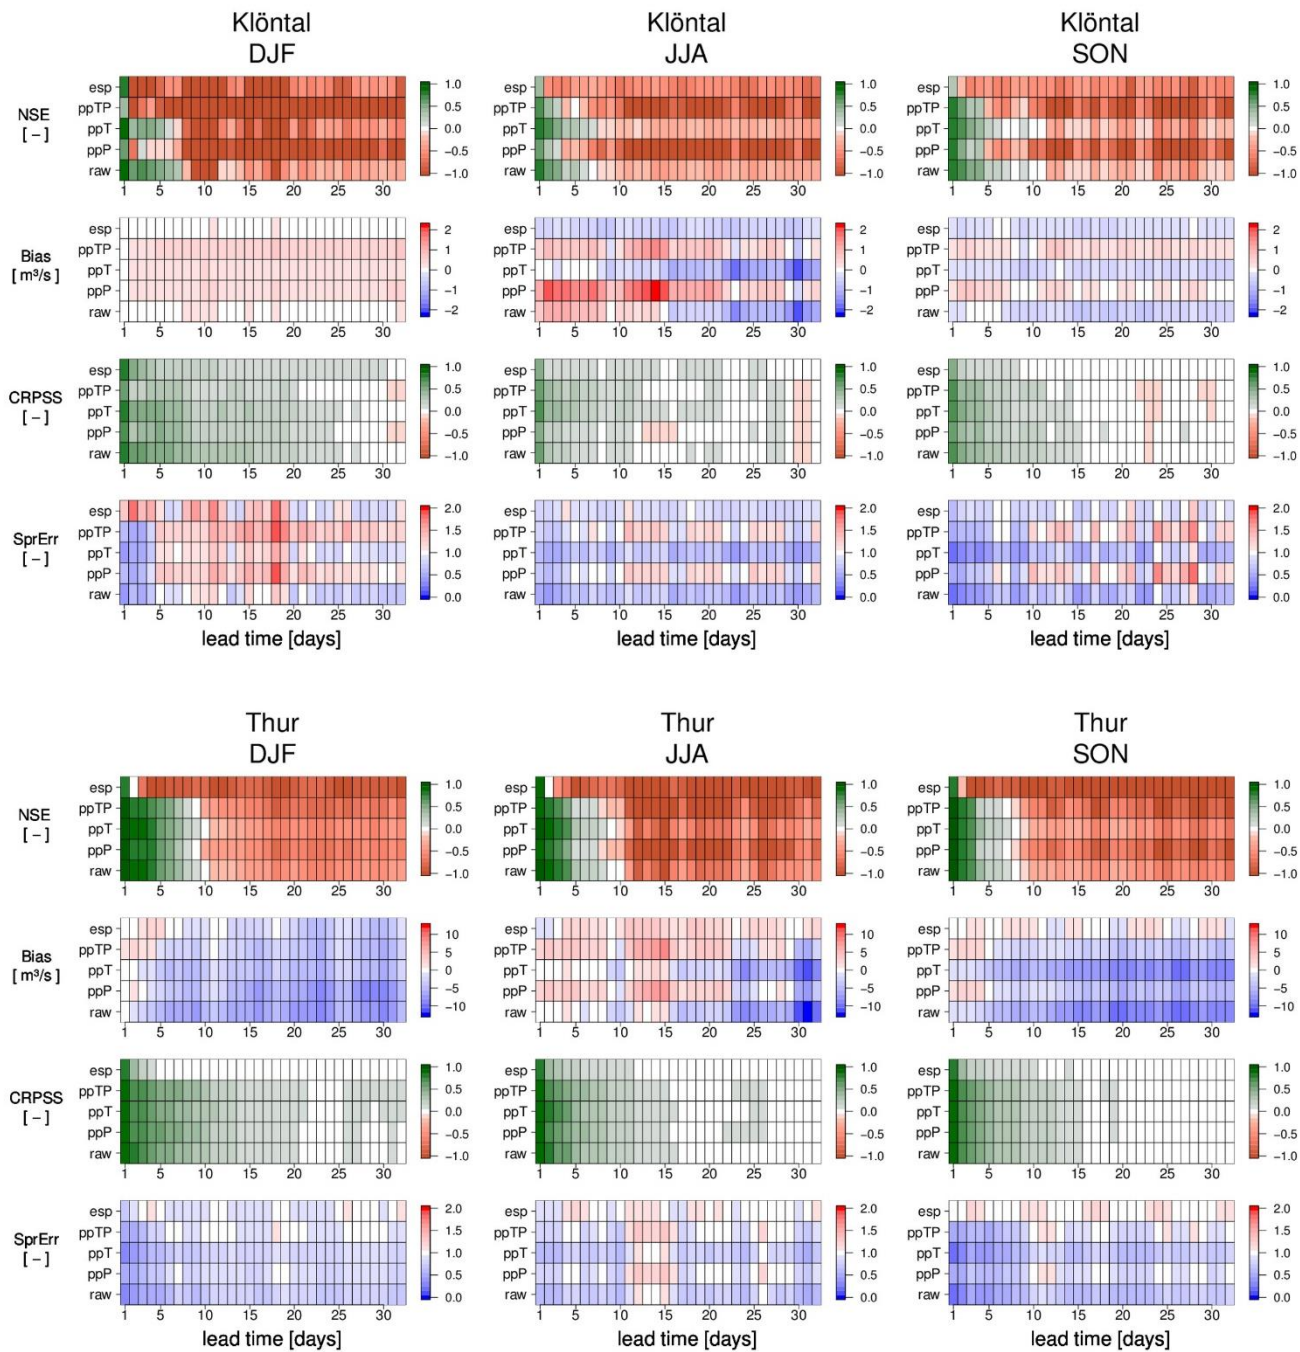

Figure S 5: As in Figure 6 but for the remaining seasons DJF, JJA and SON.

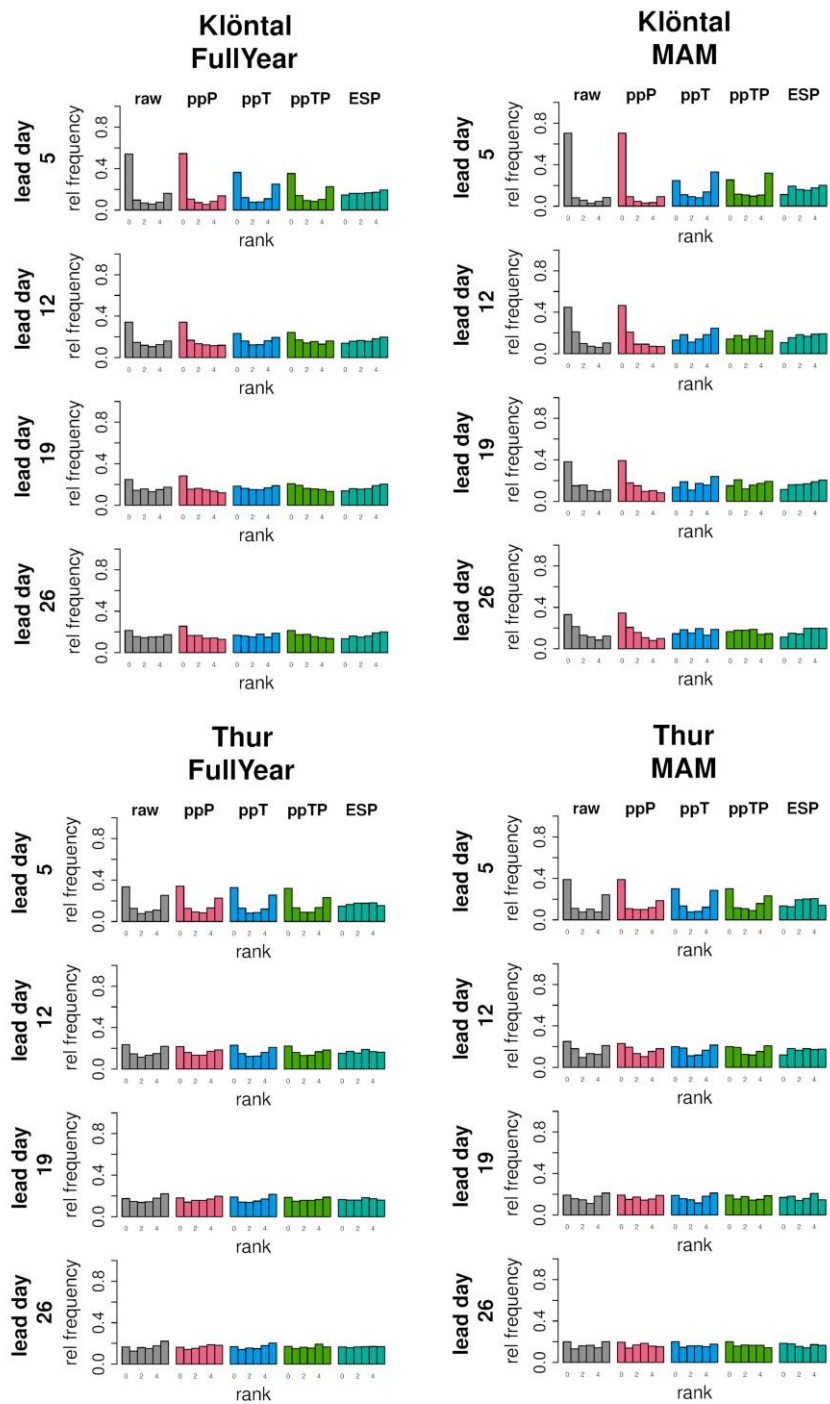

Figure S 6: As in Figure 7 but for the Klöntal and the Thur

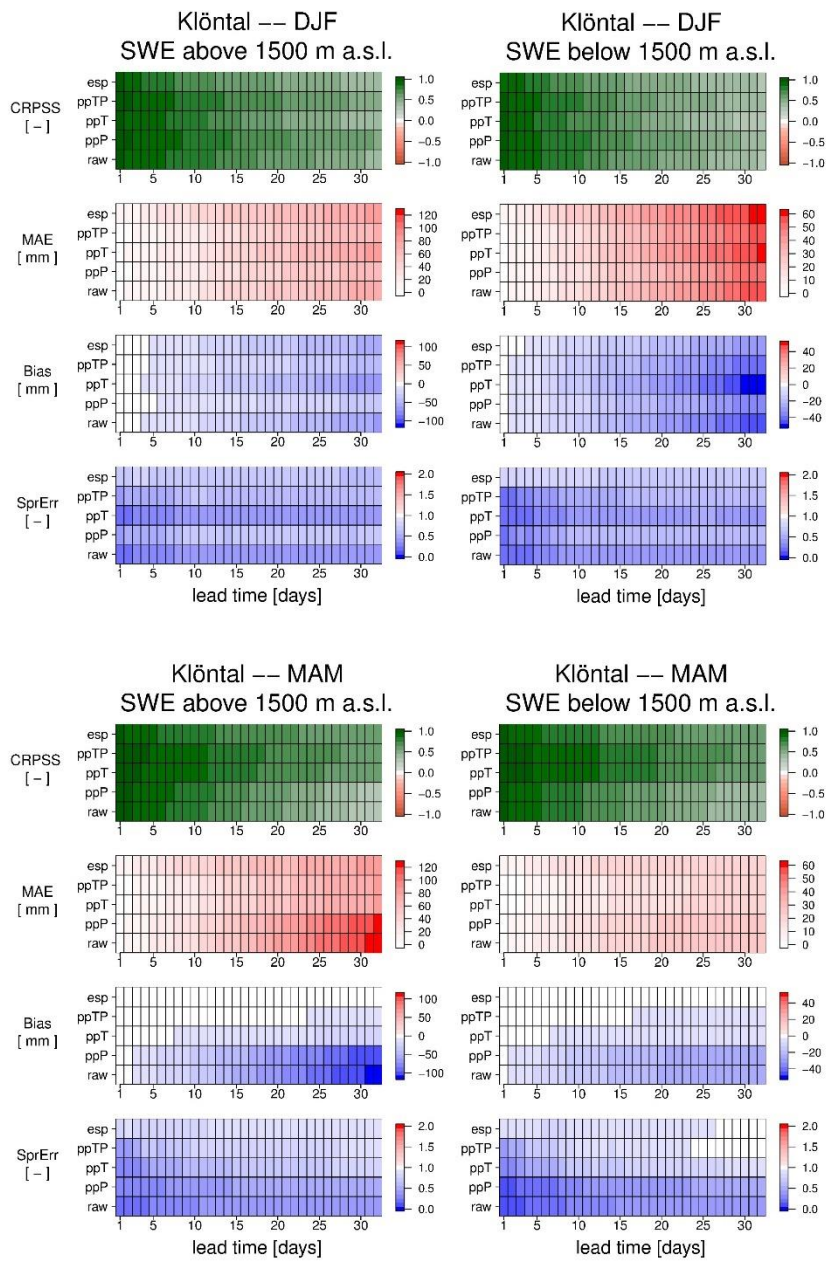

Figure S 7: As in Figure 8 but for DJF and MAM in the Klöntal catchment.



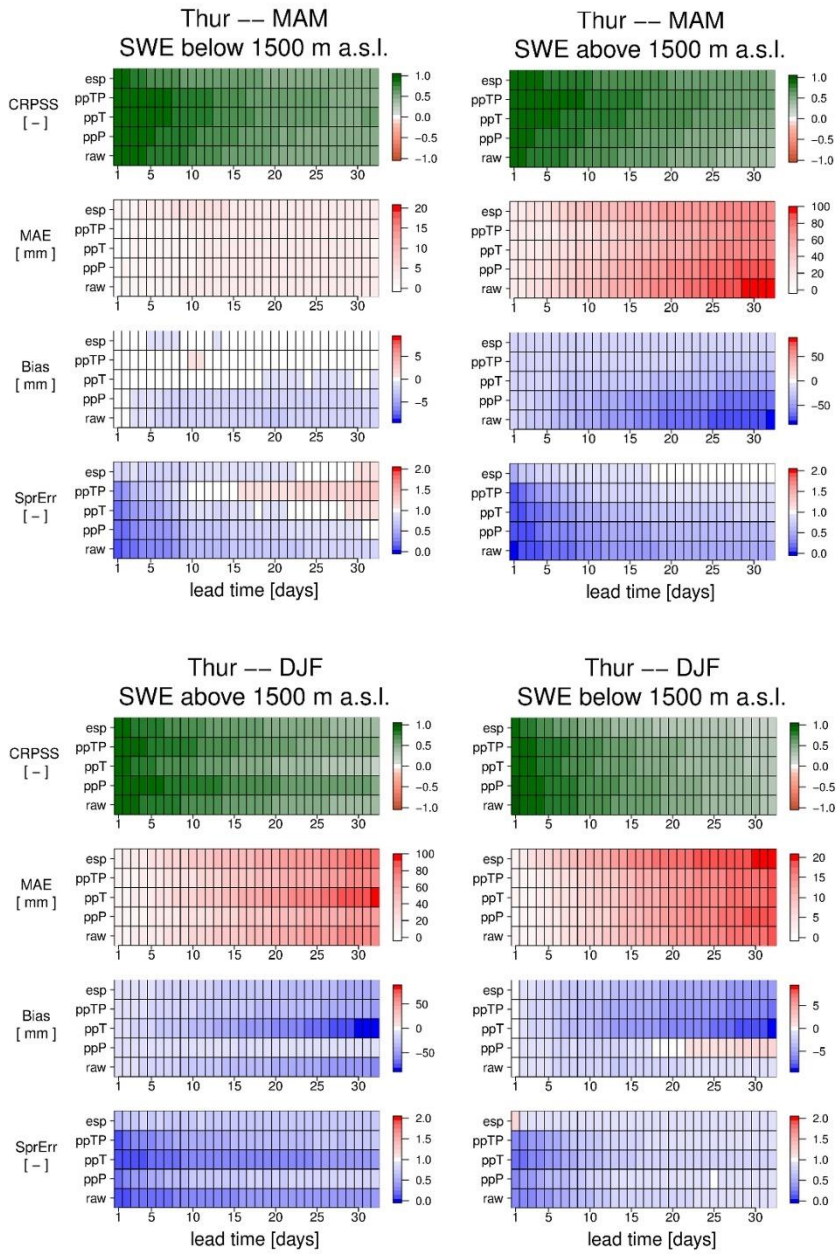

Figure S 8: As in Figure 8 but for DJF and MAM in the Thur catchment.

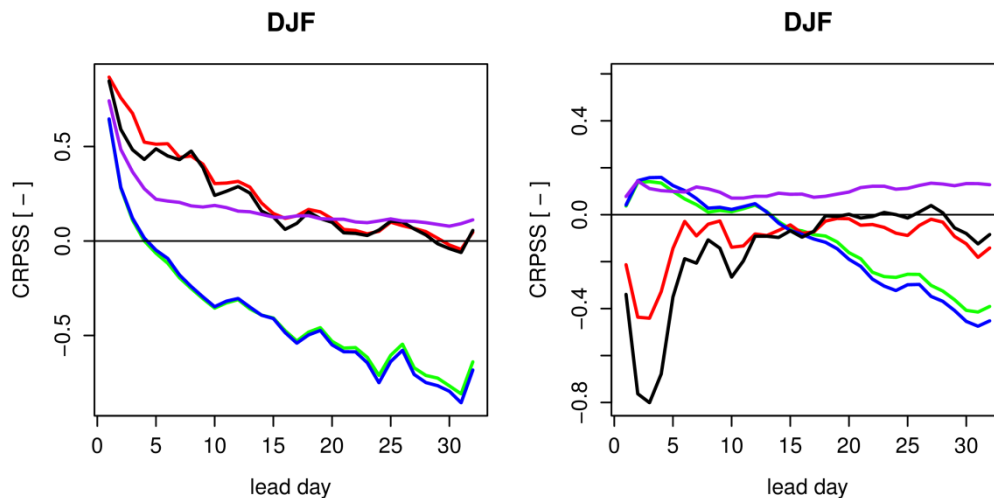

**Figure S 9:** CRPSS for the different prediction configurations ESP (purple), raw (green), ppP (blue), ppTG (red), ppTP (black). On the left for the predictions verified against the reference simulation and on the right verified against the real observations.

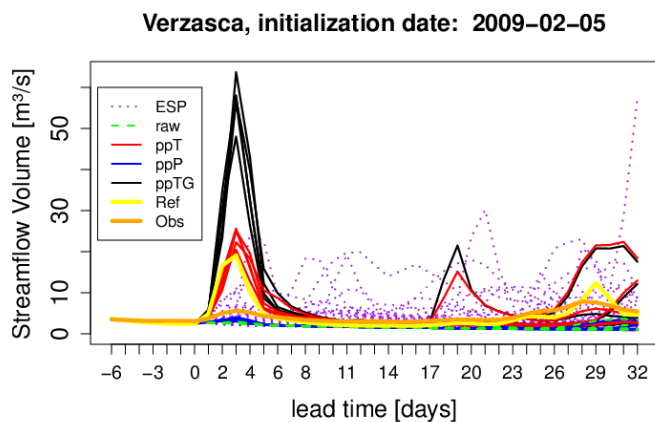

5

**Figure S 10:** Predicted streamflow for initialization date 2009-02-05 for all different versions (ESP, raw and pre-processed), the reference simulation and the observation. The initialization date is at lead day 0, prior to this day only the reference simulation and observations are plotted.

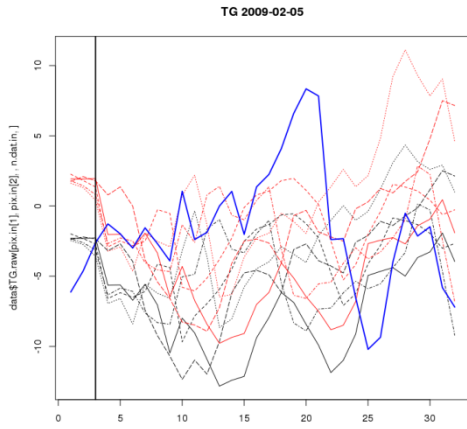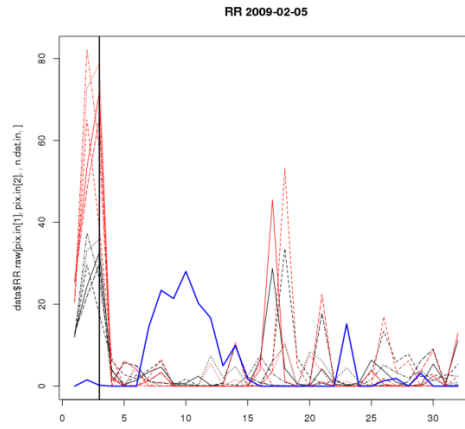

**Figure S 11: Predicted raw (black) and corrected (red) reforecasts and corresponding observations (blue) for temperature on the left and precipitation on the right. The location is in the upper third of the catchment.**

5
